# Supplementary material for: Impact of Different [Tc(N)PNP]-Scaffolds on the Biological Properties of the Small cRGDfK Peptide: Synthesis, In Vitro and In Vivo Evaluations
Source: MDPI journal article supplement (doi:10.3390/molecules27082548), 2022-04-14
Supplement: s1 [file s1]

*Article*

**Impact of Different [Tc(N)PNP]–scaffolds on the Biological Properties of the Small RGDfK Peptide: Synthesis, in Vitro and in Vivo Evaluations.**

# Supplementary

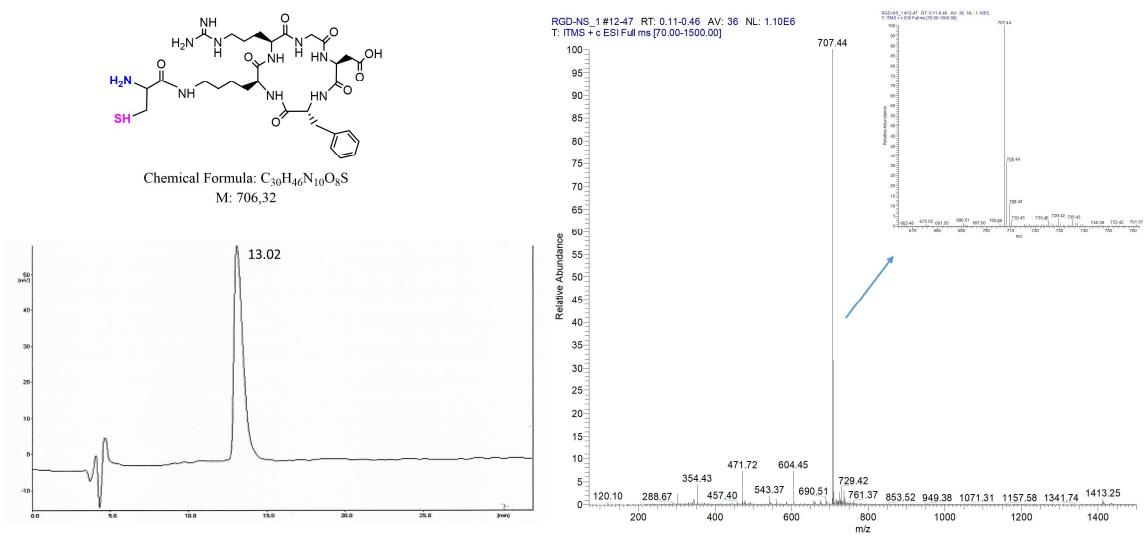

**Figure S1.** HPLC profile and ESI-MS spectrum of the pure  $H_3NS$ -RGD
